# Supplementary material
Source: MDPI journal article supplement (https://www.mdpi.com/2073-4441/14/9/1414)
Supplement: s1 [file s1]

# Evaluation of Water Quality of Buritis Lake

Renata Kikuda <sup>1</sup>, Raylane Pereira Gomes <sup>2</sup>, Aline Rodrigues Gama <sup>2</sup>, Junilsom Augusto De Paula Silva <sup>1</sup>, Adailton Pereira Dos Santos <sup>2</sup>, Keliane Rodrigues Alves <sup>2</sup>, Poliana Nascimento Arruda <sup>3</sup>, Paulo Sérgio Scalize <sup>3</sup>, Jose Daniel Vieira Gouveia <sup>2</sup>, Lilian Carla Carneiro <sup>2,\*</sup> and Debora De Jesus Pires <sup>1</sup>

**Table S1.** Identification of isolated bacteria in the water of Buritis Lake.

| Collect                        | Isolates                              | %    |
|--------------------------------|---------------------------------------|------|
| <b>n = 40</b>                  |                                       |      |
| July 2017<br>(drought season)  | <i>Acinetobacter lwoffii</i> (2)      | 5.0  |
|                                | <i>Aeromonas</i> spp. (2)             | 5.0  |
|                                | <i>Chromobacterium violaceum</i> (1)  | 2.5  |
|                                | <i>Enterobacter aerogenes</i> (4)     | 10.0 |
|                                | <i>Enterobacter cloacae</i> (1)       | 2.5  |
|                                | <i>Enterobacter</i> spp.(1)           | 2.5  |
|                                | <i>Hafnia alvei</i> (1)               | 2.5  |
|                                | <i>Klebsiella</i> spp.(3)             | 7.5  |
|                                | <i>Listeria</i> spp.(3)               | 7.5  |
|                                | <i>Moraxella</i> spp.(2)              | 5.0  |
|                                | <i>Pantoea agglomerans</i> (4)        | 10.0 |
|                                | <i>Proteus vulgaris</i> (2)           | 5.0  |
|                                | <i>Sphingomonas</i> spp.(3)           | 7.5  |
|                                | <i>Staphylococcus auricularis</i> (1) | 2.5  |
|                                | <i>Staphylococcus capitis</i> (1)     | 2.5  |
|                                | <i>Staphylococcus cohnii</i> (1)      | 2.5  |
|                                | <i>Staphylococcus epidermidis</i> (1) | 2.5  |
|                                | <i>Staphylococcus equorum</i> (1)     | 2.5  |
|                                | <i>Staphylococcus muscae</i> (2)      | 5.0  |
|                                | <i>Staphylococcus pulvereri</i> (1)   | 2.5  |
|                                | *Unidentified(3)                      | 7.5  |
| <b>n = 38</b>                  |                                       |      |
| October 2017<br>(rainy season) | <i>Corynebacterium</i> spp.(5)        | 13,2 |
|                                | <i>Enterobacter aerogenes</i> (4)     | 10.5 |
|                                | <i>Enterobacter cloacae</i> (1)       | 2.6  |
|                                | <i>Erysipelothrix</i> spp. (1)        | 2.6  |
|                                | <i>Hafnia alvei</i> (1)               | 2.6  |
|                                | <i>Klebsiella</i> spp. (2)            | 5.3  |
|                                | <i>Listeria</i> spp.(3)               | 7.9  |
|                                | <i>Moraxella</i> spp.(4)              | 10.5 |
|                                | <i>Oerskovia turbata</i> (1)          | 2.6  |
|                                | <i>Pantoea agglomerans</i> (1)        | 2.6  |
|                                | <i>Plesiomonas</i> spp.(2)            | 5.3  |
|                                | <i>Proteus mirabilis</i> (1)          | 2.6  |
|                                | <i>Proteus</i> spp. (1)               | 2.6  |
|                                | <i>Proteus vulgaris</i> (1)           | 2.6  |
|                                | <i>Proteus vulgaris</i> (1)           | 2.6  |

|                  |                                         |      |
|------------------|-----------------------------------------|------|
|                  | <i>Serratia marcescens</i> (1)          | 2.6  |
|                  | <i>Sphingomonas</i> spp.(1)             | 2.6  |
|                  | <i>Staphylococcus capitis</i> (1)       | 2.6  |
|                  | <i>Staphylococcus epidermidis</i> (1)   | 2.6  |
|                  | <i>Staphylococcus saprophyticus</i> (4) | 10.5 |
|                  | <i>Staphylococcus</i> spp.(1)           | 2.6  |
|                  | <hr/>                                   |      |
|                  | <b>n = 44</b>                           |      |
|                  | <i>Acinetobacter</i> spp.(1)            | 2.2  |
|                  | <i>Aeromonas</i> spp.(3)                | 6.8  |
|                  | <i>Bacillus</i> (1)                     | 2.3  |
|                  | <i>Bacillus barbaricus</i> (2)          | 4.5  |
|                  | <i>Bacillus</i> spp.(6)                 | 13.6 |
|                  | <i>Chromobacterium violaceum</i> (2)    | 4.5  |
|                  | <i>Corynebacterium diphtheriae</i> (1)  | 2.3  |
|                  | <i>Enterobacter aerogenes</i> (2)       | 4.5  |
| March 2018       | <i>Enterobacter</i> spp.(2)             | 4.5  |
|                  | <i>Enterococcus</i> spp.(4)             | 9.1  |
| (rainy season)   | <i>Listeria monocytogenes</i> (2)       | 4.5  |
|                  | <i>Moraxella</i> spp.(1)                | 2.3  |
|                  | <i>Pantoea agglomerans</i> (2)          | 4.5  |
|                  | <i>Planococcus</i> spp.(1)              | 2.3  |
|                  | <i>Plesiomonas</i> (1)                  | 2.3  |
|                  | <i>Serratia marcescens</i> (2)          | 4.5  |
|                  | <i>Staphylococcus arlettae</i> (1)      | 2.3  |
|                  | <i>Staphylococcus pulvereri</i> (1)     | 2.3  |
|                  | <i>Staphylococcus</i> spp(1)            | 2.3  |
|                  | <i>Streptococcus</i> spp.(2)            | 4.5  |
|                  | *Unidentified (6)                       | 13.6 |
|                  | <hr/>                                   |      |
|                  | <b>n = 46</b>                           |      |
|                  | <i>Aeromonas</i> (2)                    | 4.3  |
|                  | <i>Aeromonas</i> spp.(1)                | 2.2  |
|                  | <i>Bacillus</i> spp. (1)                | 2.2  |
|                  | <i>Burkholderia cepacia</i> (1)         | 2.2  |
|                  | <i>Cellobioscoccus lentus</i> (1)       | 2.2  |
|                  | <i>Chromobacterium violaceum</i> (2)    | 4.3  |
|                  | <i>Citrobacter</i> spp.(1)              | 2.2  |
|                  | <i>Corynebacterium afermentans</i> (2)  | 4.3  |
|                  | <i>Enterobacter aerogenes</i> (2)       | 4.3  |
|                  | <i>Enterobacter cloacae</i> (1)         | 2.2  |
|                  | <i>Enterococcus</i> spp.(7)             | 15.2 |
|                  | <i>Moraxella</i> spp.(1)                | 2.2  |
|                  | <i>Pantoea agglomerans</i> (1)          | 2.2  |
| June 2018        | <i>Planococcus</i> spp.(2)              | 4.3  |
|                  | <i>Plesiomonas</i> spp.(1)              | 2.2  |
| (drought season) | <i>Providencia</i> spp. (1)             | 2.2  |
|                  | <i>Pseudomonas luteola</i> (1)          | 2.2  |
|                  | <i>Shigella dysenteriae</i> (1)         | 2.2  |
|                  | <i>Shigella</i> spp.(1)                 | 2.2  |
|                  | <i>Shingomonas</i> spp.(2)              | 4.3  |

\*Unidentified isolates as they have not grown.

| Antimicrobials Used to Test Gram-Positive Bacteria | Antimicrobials Used to Test Gram-Negative Bacteria |
|----------------------------------------------------|----------------------------------------------------|
| Ciprofloxacin (5 µg/ disk)                         | Aztreonam (30 µg/ disk)                            |
| Clindamycin (2µg/ disk)                            | Amikacin (30 µg/ disk)                             |
| Erythromycin (15 µg/ disk)                         | Amoxicillin (10 µg/ disk)                          |
| Gentamycin (10 µg/ disk)                           | Amoxicillin / Clavulanic Acid (30 µg/ disk)        |
| Linezolid (30 µg/ disk)                            | Ampicilin (10 µg/ disk)                            |
| Novobiocin (20 µg/ disk)                           | Ampicillin + Sulbactam (20 µg/ disk)               |
| Penicillin (10 µg/ disk)                           | Cephepin (30 µg/ disk)                             |
| Rifampicin (5 µg/ disk)                            | Cefoxitin (30 µg/ disk)                            |
| Sulfazotrim (25 µg/ disk)                          | Ciprofloxacin (5µg/ disk)                          |
| Tetracycline (30 µg/ disk)                         | Cefotaxima (30 µg/ disk)                           |
|                                                    | Ceftazidime (30 µg/ disk)                          |
|                                                    | Chlorphenphenol (30 µg/ disk)                      |
|                                                    | Gentamycin (10 µg/ disk)                           |
|                                                    | Sulfazotrim (25 µg/ disk)                          |
|                                                    | Tetracycline (30 µg/ disk)                         |

[illegible]

[illegible]

| Collect                       | Sampling point | Identification number | Isolateds                           | Amoxicillin | Ampicillin | Cefepime | Cefoxitin | Ceftazidime | Ceftriaxone | Aztreonam | Ciprofloxacin | Imipenem | Amikacin | Tetracycline | Sulfazotrim | Gentamycin | Amp+ Sulb | Piperacyclin | Amo+Clav | Chlorphenphenol | Penicillin | Rifampicin | Clindamycin | Erythromycin | Linezolid | Novobiocin |
|-------------------------------|----------------|-----------------------|-------------------------------------|-------------|------------|----------|-----------|-------------|-------------|-----------|---------------|----------|----------|--------------|-------------|------------|-----------|--------------|----------|-----------------|------------|------------|-------------|--------------|-----------|------------|
| October 2017 (drought season) | 2              | 2.15                  | <i>Hafnia alvei</i>                 | -           | S          | S        | -         | S           | S           | S         | S             | S        | S        | S            | S           | S          | -         | S            | -        | -               | -          | -          | -           | -            | -         | -          |
|                               | 2              | 2.17                  | <i>Moraxella</i> spp.               | -           | -          | S        | -         | S           | -           | -         | S             | S        | S        | -            | -           | R          | -         | S            | -        | -               | -          | -          | -           | -            | -         | -          |
|                               | 2              | 2.19                  | <i>Pantoeaagglomerans</i>           | -           | R          | S        | -         | S           | S           | S         | S             | S        | S        | S            | S           | R          | -         | S            | -        | -               | -          | -          | -           | -            | -         | -          |
|                               | 2              | 2.38                  | <i>Plesiomonas</i>                  | -           | R          | S        | -         | S           | S           | S         | S             | S        | R        | S            | I           | S          | -         | S            | -        | -               | -          | -          | -           | -            | -         | -          |
|                               | 2              | 2.39                  | <i>Serratia marcescens</i>          | -           | S          | S        | -         | S           | S           | S         | S             | S        | S        | I            | S           | I          | -         | S            | -        | -               | -          | -          | -           | -            | -         | -          |
|                               | 2              | 2.16                  | <i>Moraxella</i> spp.               | -           | -          | -        | -         | S           | -           | -         | S             | S        | S        | -            | -           | R          | -         | S            | -        | -               | -          | -          | -           | -            | -         | -          |
|                               | 2              | 1.18                  | <i>Sphingomonas</i> spp.            | -           | -          | S        | -         | S           | -           | -         | S             | S        | S        | -            | -           | R          | -         | S            | -        | -               | -          | -          | -           | -            | -         | -          |
|                               | 3              | 2.4                   | <i>Staphylococcus</i> spp.          | -           | -          | -        | -         | -           | -           | -         | S             | -        | -        | S            | S           | S          | -         | -            | -        | -               | S          | S          | R           | S            | S         | S          |
|                               | 3              | 2.5                   | <i>Staphylococcus capitis</i>       | -           | -          | -        | -         | -           | -           | -         | S             | -        | -        | S            | S           | S          | -         | -            | -        | -               | R          | R          | R           | S            | S         | S          |
|                               | 3              | 2.21                  | <i>Proteus vulgaris</i>             | -           | S          | S        | -         | I           | S           | S         | R             | S        | S        | R            | S           | R          | -         | S            | -        | -               | -          | -          | -           | -            | -         | -          |
|                               | 3              | 2.22                  | <i>Proteus Mirabilis</i>            | -           | S          | S        | -         | I           | S           | S         | R             | S        | S        | R            | S           | R          | -         | S            | -        | -               | -          | -          | -           | -            | -         | -          |
|                               | 3              | 2.23                  | <i>Proteus Vulgaris</i>             | -           | R          | S        | -         | S           | S           | S         | S             | S        | S        | R            | S           | R          | -         | S            | -        | -               | -          | -          | -           | -            | -         | -          |
|                               | 3              | 2.41                  | <i>Plesiomonas</i>                  | -           | R          | S        | -         | S           | S           | S         | S             | S        | R        | S            | I           | S          | -         | S            | -        | -               | -          | -          | -           | -            | -         | -          |
|                               | 3              | 2.42                  | <i>Klebsiella</i> spp.              | -           | S          | S        | -         | S           | S           | S         | S             | S        | S        | S            | S           | S          | -         | S            | -        | -               | -          | -          | -           | -            | -         | -          |
|                               | 4              | 2.6                   | <i>Staphylococcus saprophyticus</i> | -           | -          | -        | -         | -           | -           | -         | S             | -        | -        | R            | S           | S          | -         | -            | -        | -               | R          | S          | S           | S            | S         | R          |
|                               | 4              | 2.25                  | <i>Staphylococcus saprophyticus</i> | -           | -          | -        | -         | -           | -           | -         | S             | -        | -        | S            | S           | S          | -         | -            | -        | -               | R          | R          | R           | R            | R         | R          |
|                               | 4              | 2.43                  | <i>Klebsiella</i> spp.              | -           | R          | R        | -         | R           | R           | S         | I             | S        | S        | S            | S           | S          | -         | S            | -        | -               | -          | -          | -           | -            | -         | -          |
|                               | 4              | 2.44                  | <i>Enterobacter aerogenes</i>       | -           | R          | S        | -         | S           | S           | S         | S             | S        | S        | S            | S           | S          | -         | S            | -        | -               | -          | -          | -           | -            | -         | -          |
|                               | 5              | 2.9                   | <i>Staphylococcus saprophyticus</i> | -           | -          | -        | -         | -           | -           | -         | S             | -        | -        | S            | S           | S          | -         | -            | -        | -               | R          | S          | S           | S            | S         | R          |
|                               | 5              | 2.1                   | <i>Staphylococcus epidermidis</i>   | -           | -          | -        | -         | -           | -           | -         | S             | -        | -        | S            | S           | S          | -         | -            | -        | -               | S          | S          | S           | I            | S         | S          |
|                               | 5              | 2.31                  | <i>Moraxella</i> spp.               | -           | -          | S        | -         | S           | -           | -         | S             | S        | S        | -            | -           | R          | S         | S            | -        | -               | -          | -          | -           | -            | -         | -          |
|                               | 5              | 2.29                  | <i>Proteus</i> spp.                 | -           | S          | S        | -         | S           | S           | S         | S             | S        | S        | R            | S           | S          | S         | S            | -        | -               | -          | -          | -           | -            | -         | -          |
|                               | 5              | 2.32                  | <i>Enterobacter aerogenes</i>       | -           | R          | S        | S         | S           | S           | S         | S             | S        | S        | S            | S           | S          | -         | S            | -        | -               | -          | -          | -           | -            | -         | -          |
|                               | 6              | 2.13                  | <i>Staphylococcus saprophyticus</i> | -           | -          | -        | -         | -           | -           | S         | -             | -        | R        | S            | S           | -          | -         | -            | -        | -               | R          | S          | S           | S            | S         | R          |
|                               | 6              | 2.35                  | <i>Moraxella</i> spp.               | -           | -          | S        | S         | -           | -           | S         | S             | S        | -        | -            | R           | S          | -         | S            | -        | -               | -          | -          | -           | -            | -         | -          |

| Collect                   | Sampling point | Identification number | Isolates                         | Amoxicillin | Ampicillin | Cefepime | Cefoxitin | Ceftazidime | Ceftriaxone | Aztreonam | Ciprofloxacin | Imipenem | Amikacin | Tetracycline | Sulfazotrim | Gentamycin | Amp+ Sulb | Piperacilin | Amo+Clav | Chlorphenphenol | Penicillin | Rifampicin | Clindamycin | Erythromycin | Linezolid | Novobiocin |
|---------------------------|----------------|-----------------------|----------------------------------|-------------|------------|----------|-----------|-------------|-------------|-----------|---------------|----------|----------|--------------|-------------|------------|-----------|-------------|----------|-----------------|------------|------------|-------------|--------------|-----------|------------|
| March 2018 (rainy season) | 6              | 2.49                  | <i>Enterobacter aerogenes</i>    | -           | R          | S        | S         | S           | S           | S         | S             | S        | S        | S            | S           | S          | -         | S           | -        | -               | -          | -          | -           | -            | -         | -          |
|                           | 6              | 2.5                   | <i>Enterobacter cloacae</i>      | -           | S          | S        | R         | R           | R           | I         | S             | R        | S        | R            | I           | R          | -         | S           | -        | -               | -          | -          | -           | -            | -         | -          |
|                           | 6              | 2.52                  | <i>Enterobacter aerogenes</i>    | -           | R          | S        | S         | S           | S           | S         | S             | S        | S        | S            | S           | S          | -         | S           | -        | -               | -          | -          | -           | -            | -         | -          |
|                           | 2              | 3.2                   | <i>Plesiomonas</i>               | -           | R          | R        | -         | R           | I           | S         | S             | S        | S        | S            | R           | S          | -         | S           | R        | -               | -          | -          | -           | -            | -         | -          |
|                           | 2              | 3.4                   | <i>Enterococcus spp.</i>         | -           | -          | -        | -         | -           | -           | -         | R             | -        | -        | -            | S           | S          | -         | -           | -        | -               | R          | R          | R           | R            | R         | R          |
|                           | 2              | 3.18                  | <i>Streptococcus spp.</i>        | -           | -          | -        | -         | -           | -           | -         | S             | -        | -        | S            | S           | -          | -         | -           | -        | S               | R          | R          | R           | R            | R         | R          |
|                           | 3              | 3.6                   | <i>Serratia marcescens</i>       | -           | S          | I        | -         | S           | I           | S         | S             | R        | R        | R            | R           | R          | -         | S           | R        | -               | -          | -          | -           | -            | -         | -          |
|                           | 3              | 3.7                   | <i>Staphylococcus spp</i>        | -           | -          | -        | -         | -           | -           | -         | R             | -        | -        | S            | R           | S          | -         | -           | -        | -               | R          | S          | -           | S            | S         | R          |
|                           | 3              | 3.8                   | <i>Enterococcus spp.</i>         | -           | -          | -        | -         | -           | -           | -         | I             | -        | -        | S            | S           | S          | -         | -           | -        | -               | R          | R          | R           | R            | R         | R          |
|                           | 3              | 3.9                   | <i>Streptococcus spp.</i>        | -           | -          | -        | -         | -           | -           | -         | S             | -        | -        | -            | R           | -          | -         | -           | -        | -               | -          | S          | R           | S            | R         | R          |
|                           | 3              | 3.22                  | <i>Enterococcus spp.</i>         | -           | -          | -        | -         | -           | -           | -         | S             | -        | -        | S            | R           | S          | -         | -           | -        | -               | R          | R          | R           | R            | R         | R          |
|                           | 3              | 3.23                  | <i>Enterococcus spp.</i>         | -           | R          | S        | -         | R           | -           | S         | S             | S        | S        | S            | S           | S          | -         | -           | -        | -               | S          | -          | -           | -            | -         | -          |
|                           | 4              | 3.1                   | <i>Staphylococcus pulvereri</i>  | -           | -          | -        | -         | -           | -           | -         | R             | -        | -        | S            | S           | S          | -         | -           | -        | -               | R          | R          | R           | R            | R         | R          |
|                           | 4              | 3.26                  | <i>Aeromonas spp.</i>            | -           | -          | R        | -         | S           | S           | -         | S             | S        | S        | S            | S           | S          | -         | S           | -        | -               | -          | -          | -           | -            | -         | R          |
|                           | 4              | 3.27                  | <i>Aeromonas spp.</i>            | -           | R          | R        | -         | S           | S           | S         | S             | S        | -        | S            | S           | S          | -         | S           | R        | -               | -          | -          | -           | -            | -         | -          |
|                           | 5              | 3.28                  | <i>Enterobacter aerogenes</i>    | -           | R          | R        | -         | S           | -           | S         | S             | S        | S        | S            | -           | S          | -         | S           | R        | -               | -          | -          | -           | S            | -         | -          |
|                           | 5              | 3.31                  | <i>Pantoea agglomerans</i>       | -           | R          | R        | -         | S           | -           | S         | S             | S        | S        | S            | R           | S          | -         | S           | S        | -               | -          | -          | -           | -            | -         | -          |
|                           | 6              | 3.32                  | <i>Enterobacter spp.</i>         | -           | S          | R        | -         | S           | R           | S         | S             | S        | S        | S            | S           | I          | -         | -           | S        | -               | -          | -          | -           | -            | -         | -          |
|                           | 6              | 3.33                  | <i>Enterobacter aerogenes</i>    | -           | S          | R        | -         | S           | -           | S         | S             | S        | S        | S            | S           | S          | -         | S           | R        | -               | -          | -          | -           | -            | -         | -          |
|                           | 6              | 3.34                  | <i>Planococcus spp.</i>          | -           | -          | -        | -         | -           | -           | -         | S             | -        | -        | S            | I           | I          | -         | -           | -        | -               | R          | R          | R           | S            | R         | R          |
|                           | 6              | 3.35                  | <i>Staphylococcus arlettae</i>   | -           | -          | -        | -         | -           | -           | -         | S             | -        | -        | R            | R           | S          | -         | -           | R        | -               | R          | R          | R           | R            | R         | R          |
| June 2018 (rainy season)  | 2              | 4.8                   | <i>Pantoea agglomerans</i>       | -           | R          | S        | -         | S           | S           | S         | S             | S        | S        | S            | S           | S          | -         | S           | S        | -               | -          | -          | -           | -            | -         | -          |
|                           | 3              | 4.1                   | <i>Aeromonas</i>                 | -           | R          | S        | -         | S           | S           | S         | S             | S        | S        | S            | S           | S          | -         | S           | R        | -               | -          | -          | -           | -            | -         | -          |
|                           | 3              | 4.11                  | <i>Chromobacterium violaceum</i> | -           | R          | S        | -         | R           | R           | I         | S             | I        | S        | S            | S           | R          | -         | S           | R        | -               | -          | -          | -           | -            | -         | -          |

| Collect | Sampling point | Identification number | Isolates                         | Amoxicillin | Ampicillin | Cefepime | Cefoxitin | Ceftazidime | Ceftriaxone | Aztreonam | Ciprofloxacin | Imipenem | Amikacin | Tetracycline | Sulfazotrim | Gentamycin | Amp+ Sulb | Piperacilin | Amo+Clav | Chlorphenphenol | Penicillin | Rifampicin | Clindamycin | Erythromycin | Linezolid | Novobiocin |
|---------|----------------|-----------------------|----------------------------------|-------------|------------|----------|-----------|-------------|-------------|-----------|---------------|----------|----------|--------------|-------------|------------|-----------|-------------|----------|-----------------|------------|------------|-------------|--------------|-----------|------------|
|         | 3              | 4.16                  | <i>Pseudomonas luteola</i>       | -           | -          | S        | -         | S           | -           | S         | -             | S        | S        | -            | -           | S          | -         | S           | -        | -               | -          | -          | -           | -            | -         | -          |
|         | 3              | 4.17                  | <i>Staphylococcus arlettae</i>   | -           | -          | -        | -         | -           | -           | -         | S             | -        | -        | S            | S           | S          | -         | -           | -        | S               | S          | S          | S           | S            | S         | S          |
|         | 3              | 4.18                  | <i>Planococcus</i> spp.          | -           | -          | -        | -         | -           | -           | -         | S             | -        | -        | S            | S           | S          | -         | -           | -        | S               | R          | R          | R           | -            | R         | R          |
|         | 3              | 4.2                   | <i>Enterococcus</i> spp.         | -           | -          | -        | -         | -           | -           | -         | S             | -        | -        | S            | S           | S          | -         | -           | -        | S               | R          | R          | R           | R            | R         | R          |
|         | 3              | 4.21                  | <i>Aeromonas</i> spp.            | -           | -          | S        | -         | S           | -           | S         | S             | S        | S        | S            | -           | -          | -         | -           | I        | -               | -          | -          | -           | -            | -         | -          |
|         | 4              | 4.22                  | <i>Staphylococcus</i> spp.       | -           | -          | -        | -         | -           | -           | -         | S             | -        | -        | S            | S           | S          | -         | -           | -        | S               | R          | R          | R           | R            | R         | R          |
|         | 4              | 4.24                  | <i>Shigella dysenteriae</i>      | -           | R          | S        | -         | S           | S           | S         | S             | S        | S        | S            | S           | S          | -         | S           | R        | -               | -          | -          | -           | -            | -         | -          |
|         | 4              | 4.25                  | <i>Citrobacter</i> spp.          | -           | S          | S        | -         | S           | S           | S         | S             | S        | S        | S            | S           | S          | -         | S           | S        | -               | -          | -          | -           | -            | -         | -          |
|         | 4              | 4.28                  | <i>Enterobacter cloacae</i>      | -           | I          | S        | -         | S           | S           | S         | S             | S        | S        | S            | S           | S          | -         | S           | S        | -               | -          | -          | -           | -            | -         | -          |
|         | 4              | 4.29                  | <i>Enterobacter aerogenes</i>    | -           | I          | S        | -         | S           | S           | S         | S             | S        | S        | S            | S           | S          | -         | S           | S        | -               | -          | -          | -           | -            | -         | -          |
|         | 5              | 4.3                   | <i>Cellobioscoccus lentus</i>    | -           | -          | -        | -         | -           | -           | -         | S             | -        | -        | S            | S           | S          | -         | -           | -        | S               | R          | R          | R           | R            | R         | R          |
|         | 5              | 4.31                  | <i>Enterobacter aerogenes</i>    | -           | -          | S        | -         | S           | S           | S         | S             | S        | S        | S            | S           | S          | -         | S           | -        | -               | -          | -          | -           | -            | -         | -          |
|         | 5              | 4.32                  | <i>Aeromonas</i>                 | -           | -          | S        | -         | S           | -           | S         | S             | S        | S        | S            | -           | -          | R         | -           | -        | S               | -          | -          | -           | -            | -         | -          |
|         | 5              | 4.33                  | <i>Chromobacterium violaceum</i> | -           | R          | I        | -         | R           | R           | S         | S             | I        | S        | S            | S           | R          | -         | S           | R        | -               | -          | -          | -           | -            | -         | -          |
|         | 5              | 4.34                  | <i>Planococcus</i> pp.           | -           | -          | -        | -         | -           | -           | -         | S             | -        | -        | S            | S           | R          | -         | -           | -        | S               | R          | R          | R           | R            | R         | R          |
|         | 5              | 4.35                  | <i>Staphylococcus pulvereri</i>  | -           | -          | -        | -         | -           | -           | -         | S             | -        | -        | S            | S           | S          | -         | -           | -        | S               | R          | R          | R           | R            | R         | R          |
|         | 5              | 4.37                  | <i>Enterococcus</i> spp.         | -           | -          | -        | -         | -           | -           | -         | S             | -        | -        | S            | S           | R          | -         | -           | -        | S               | R          | R          | R           | R            | R         | R          |
|         | 5              | 4.38                  | <i>Enterococcus</i> spp.         | -           | -          | -        | -         | -           | -           | -         | S             | -        | -        | S            | S           | S          | -         | -           | -        | S               | R          | R          | R           | R            | R         | R          |
|         | 6              | 4.39                  | <i>Enterococcus</i> spp.         | -           | -          | -        | -         | -           | -           | -         | S             | -        | -        | S            | S           | S          | -         | -           | -        | S               | R          | R          | R           | R            | R         | R          |
|         | 6              | 4.4                   | <i>Providencias</i> spp.         | -           | R          | S        | -         | S           | S           | S         | S             | S        | S        | S            | S           | S          | -         | S           | R        | -               | -          | -          | -           | -            | -         | -          |
|         | 6              | 4.41                  | <i>Enterococcus</i> spp.         | -           | -          | -        | -         | -           | -           | -         | S             | -        | -        | S            | S           | S          | -         | -           | -        | -               | R          | R          | R           | R            | R         | R          |
|         | 6              | 4.42                  | <i>Enterococcus</i> spp.         | -           | -          | -        | -         | -           | -           | -         | S             | -        | -        | S            | S           | S          | S         | -           | -        | R               | R          | R          | R           | R            | R         | R          |
|         | 6              | 4.43                  | <i>Shigella</i> spp.             | -           | R          | S        | -         | S           | S           | S         | S             | I        | S        | S            | S           | S          | -         | S           | R        | -               | -          | -          | -           | -            | -         | -          |
|         | 6              | 4.44                  | <i>Enterococcus</i> spp.         | -           | -          | -        | -         | -           | -           | -         | S             | -        | -        | S            | S           | S          | -         | -           | -        | S               | S          | R          | S           | S            | S         | S          |
|         | 6              | 4.45                  | <i>Staphylococcus muscae</i>     | -           | -          | -        | -         | -           | -           | -         | S             | -        | -        | S            | S           | S          | -         | -           | -        | S               | S          | S          | S           | S            | S         | S          |

| Collect | Sampling point | Identification number        | Isolateds | Amoxicillin | Ampicillin | Cefepime | Cefoxitin | Ceftazidime | Ceftriaxone | Aztreonam | Ciprofloxacin | Imipenem | Amikacin | Tetracycline | Sulfazotrim | Gentamycin | Amp+ Sulb | Piperacilin | Amo+Clav | Chlorphenphenol | Penicillin | Rifampicin | Clindamycin | Erythromycin | Linezolid | Novobiocin |
|---------|----------------|------------------------------|-----------|-------------|------------|----------|-----------|-------------|-------------|-----------|---------------|----------|----------|--------------|-------------|------------|-----------|-------------|----------|-----------------|------------|------------|-------------|--------------|-----------|------------|
| 6       | 4.46           | <i>Staphylococcus muscae</i> | -         | R           | S          | -        | S         | S           | S           | S         | S             | S        | S        | S            | S           | S          | -         | S           | I        | -               | -          | -          | -           | -            | -         | -          |

Legend: R- Resistant; I- Intermediate; S- Sensible.

**Table S4.** Analyte, flame, laps, wavelength and LOD studied in this work.

| Analyte | Flame          | Laps                                                            | Wavelength<br><sup>a</sup> (nm) | LOD<br>(Limit of<br>Detection) <sup>b</sup><br>(µg/L) |
|---------|----------------|-----------------------------------------------------------------|---------------------------------|-------------------------------------------------------|
| Fe      | air/ acetylene | Multi element hollow<br>Cathode lamp (Fe; Cr,<br>Cu, Ni and Mn) | 248.3                           | 6.2                                                   |
| Cd      | air/ acetylene | Multi element hollow<br>Cathode lamp (Cd and<br>Pb)             | 228.8                           | 3.4                                                   |
| Cr      | air/ acetylene | Multi element hollow<br>Cathode lamp (Fe; Cr,<br>Cu, Ni and Mn) | 357.9                           | 6.1                                                   |
| Cu      | air/ acetylene | Multi element hollow<br>Cathode lamp (Fe; Cr,<br>Cu, Ni and Mn) | 324.7                           | 5.4                                                   |
| Pb      | air/ acetylene | Multi element hollow<br>Cathode lamp (Cd and<br>Pb)             | 283.3                           | 42                                                    |
| Li      | air/ acetylene | Lithium hollow<br>Cathode lamp                                  | 670.8                           | 3.7 <sup>c</sup>                                      |
| Mg      | air/ acetylene | Magnesium hollow<br>Cathode lamp                                | 285.2                           | 30                                                    |

<sup>a</sup> The wave lengths listed are recommended because of their sensitivity and overall acceptability. Other wavelengths may be substituted IF they can provide the needed sensitivity and are treated with the same corrective techniques for spectral interference.

<sup>b</sup> These estimated 3-sigma instrumental detection limits<sup>16</sup> are provided only as a guide to instrumental limits. The method detection limits are sample dependent and may vary as the sample matrix varies. Detection limits for solids can be estimated by dividing these values by the grams extracted per liter, which depends upon the extraction procedure. Divide solution detection limits by 10 for 1 g extracted to 100 mL for solid detection limits.

<sup>c</sup> Calculated from 2-sigma data.
